# Supplementary material for: High-Stability Silver Nanowire–Al2O3 Composite Flexible Transparent Electrodes Prepared by Electrodeposition
Source: MDPI journal article supplement (doi:10.3390/nano11113047), 2021-11-12
Supplement: s1 [file s1]

Supporting Material

# High-Stability Silver Nanowire–Al<sub>2</sub>O<sub>3</sub> Composite Flexible Transparent Electrodes Prepared by Electrodeposition

Honglong Ning <sup>1</sup>, Junlong Chen <sup>1</sup>, Zhihang Li <sup>1</sup>, Zhuohui Xu <sup>2</sup>, Rihui Yao <sup>1,\*</sup>, Hongfu Liang <sup>1</sup>, Taijiang Liu <sup>1</sup>, Guoping Su <sup>1</sup>, Dongxiang Luo <sup>3,\*</sup> and Junbiao Peng <sup>1</sup>

<sup>1</sup> State Key Laboratory of Luminescent Materials and Devices, Institute of Polymer Optoelectronic Materials and Devices, South China University of Technology, Guangzhou 510640, China; ninghl@scut.edu.cn (H.N.); msjlchen@gmail.com (J.C.); mslzhscut@mail.scut.edu.cn (Z.L.); 201530291429@mail.scut.edu.cn (H.L.); ltjscut@163.com (T.L.); 201730321254@mail.scut.edu.cn (G.S.); psjbpeng@scut.edu.cn (J.P.)

<sup>2</sup> Guangxi Key Lab of Agricultural Resources Chemistry and Biotechnology, Yulin Normal University, Yulin 537000, China; xzh21@ylu.edu.cn

<sup>3</sup> Laboratory for Clean Energy and Materials, Guangzhou Key Huangpu Hydrogen Innovation Center, School of Chemistry and Chemical Engineering, Institute of Clean Energy and Materials, Guangzhou University, Guangzhou 510006, China

\* Correspondence: yaorihui@scut.edu.cn (R.Y.); luodx@gdut.edu.cn (D.L.)

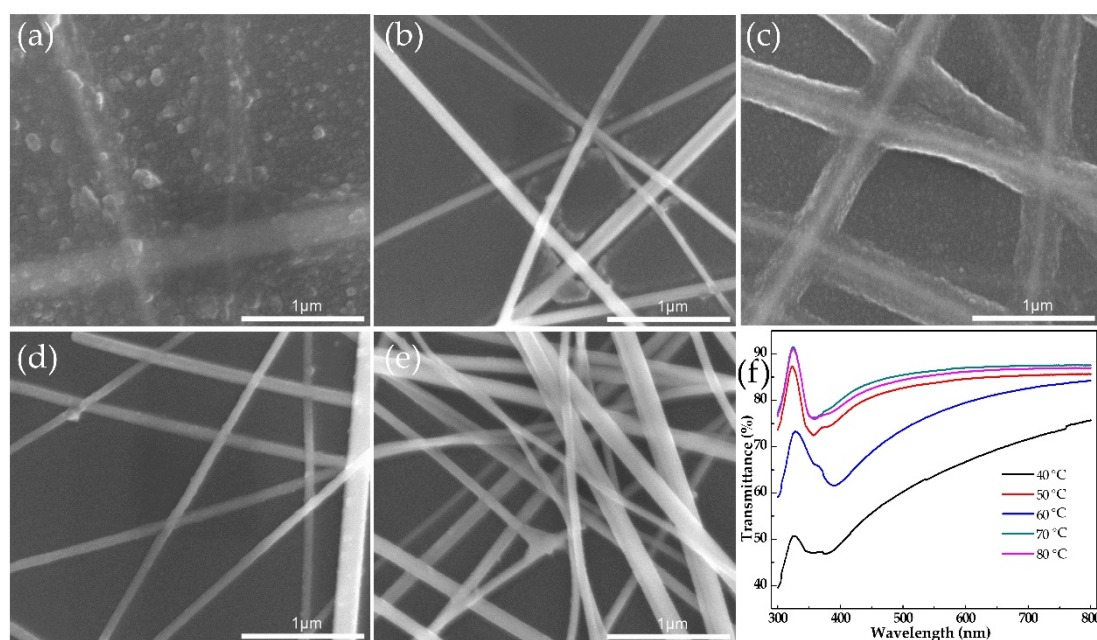

**Figure S1.** SEM images of electrodeposited Al<sub>2</sub>O<sub>3</sub> at different temperatures for 5 min: (a) 40 °C; (b) 50 °C; (c) 60 °C; (d) 70 °C; (e) 80 °C and (f) UV-Visible transmittance spectra of products at different temperatures.

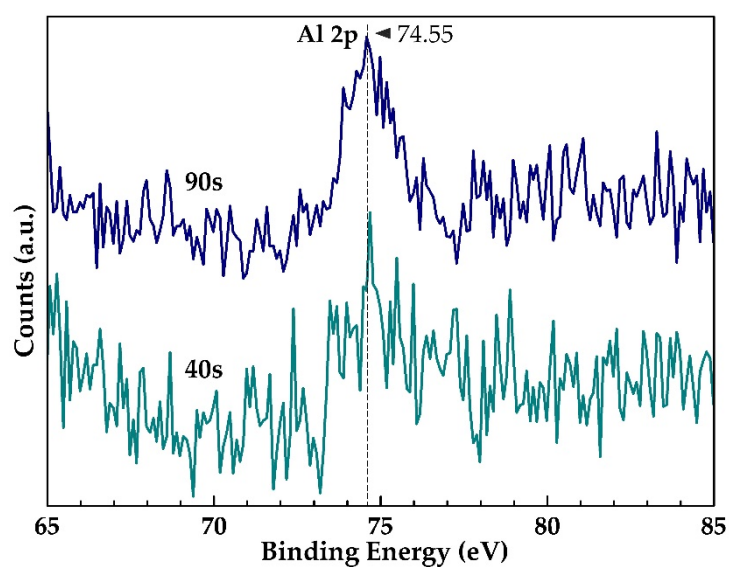

**Figure S2.** Al2p XPS spectra of films deposited for 40 s and 90 s.

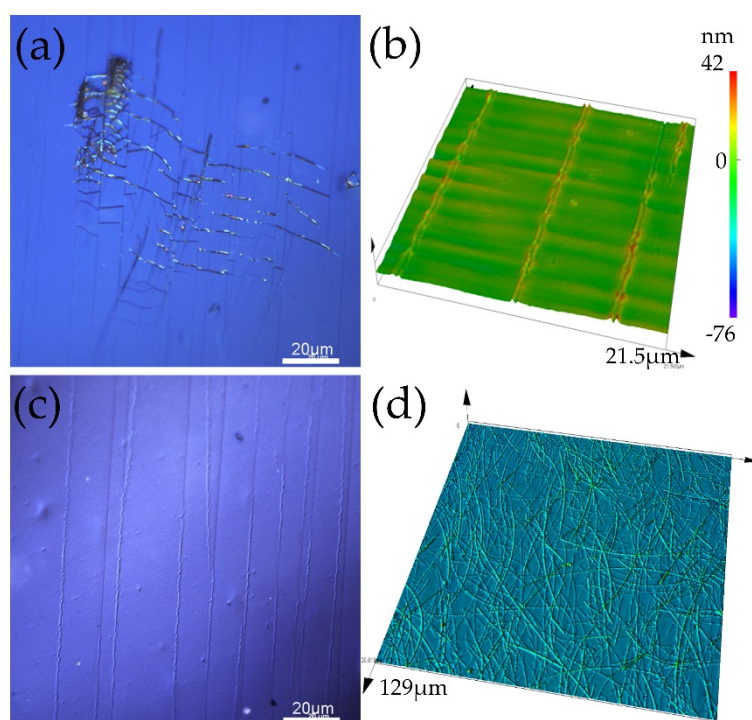

**Figure S3.** CLSM image of films after bending test: (a) reticulated cracks; (b) 3D scanning; (c) transverse cracks of the ITO-PET film after 2000 bending cycles; (d) 3D scanning image of AgNWs-Al<sub>2</sub>O<sub>3</sub> composite film after 250,000 bending cycles.

**Table S1.** Changes in the optical and electrical properties of the films before and after ultrasonic treatment for 5 min.

| Sample              |                                                 | Pristine | After electrodeposition |
|---------------------|-------------------------------------------------|----------|-------------------------|
| Ultrasonic time/min |                                                 | 5 min    | 5 min                   |
| Before              | Transmittance/%                                 | 88.10    | 88.19                   |
|                     | Sheet Resistance/ $\Omega \cdot \text{sq}^{-1}$ | 16.3     | 17.0                    |

|       |                                                 |       |       |
|-------|-------------------------------------------------|-------|-------|
|       | FoM                                             | 17.28 | 16.74 |
|       | Transmittance/%                                 | 98.12 | 92.40 |
| After | Sheet Resistance/ $\Omega \cdot \text{sq}^{-1}$ | —     | 160.5 |
|       | FoM                                             | —     | 2.83  |
|       | FoM Change Rate/%                               | —     | 83.12 |
|       | $(R-R_0)/R_0$                                   | —     | 8.44  |
|       | Remaining rate/%                                | 15.80 | 64.35 |

Table S2. Relationship between sheet resistance change rate and bending cycles.

| bending cycles<br>$(R_s-R_0)/R_0$ | 10    | 100   | 1,000 | 10,000 | 30,000 | 70,000 | 170,000 | 250,000 |
|-----------------------------------|-------|-------|-------|--------|--------|--------|---------|---------|
| Pristine AgNW                     | −0.17 | −0.26 | −0.12 | 0.30   | 1.56   | 0.67   | 0.44    | 1.38    |
| Before annealing                  | −0.06 | 0.16  | −0.08 | 0.28   | 0.58   | 1.34   | 0.91    | 1.17    |
| After annealing                   | 0.07  | −0.16 | −0.21 | −0.05  | 0.03   | 0.02   | 0.05    | 0.47    |
| ITO                               | 0.12  | 0.85  | 2.09  | —      | —      | —      | —       | —       |
